# Supplementary material for: Time-Dependent Prediction Models for Individual Prognosis of Chronic Postsurgical Pain following Knee Replacement Based on an Extensive Multivariable Data Set
Source: MDPI journal article supplement (doi:10.3390/jcm13030862), 2024-02-01
Supplement: s1 [file s1]

**Table S1:** Extended descriptive data for all variables

| Parameter - short form | Time point | WOMAC pain ≤75 (N=157) | WOMAC pain >75 (N=469) | Total (N=626) | p value |
|------------------------|------------|------------------------|------------------------|---------------|---------|
| <b>Sex</b>             | ind        |                        |                        |               | 0.581   |
| Male                   |            | 72 (45.9%)             | 227 (48.4%)            | 299 (47.8%)   |         |
| Female                 |            | 85 (54.1%)             | 242 (51.6%)            | 327 (52.2%)   |         |
| <b>Smoker</b>          | ind        |                        |                        |               | 0.850   |
| N-Miss                 |            | 0                      | 3                      | 3             |         |
| No                     |            | 141 (89.8%)            | 416 (89.3%)            | 557 (89.4%)   |         |
| Yes                    |            | 16 (10.2%)             | 50 (10.7%)             | 66 (10.6%)    |         |
| <b>Alcohol</b>         | ind        |                        |                        |               | 0.325   |
| N-Miss                 |            | 21                     | 52                     | 73            |         |
| No                     |            | 123 (90.4%)            | 364 (87.3%)            | 487 (88.1%)   |         |
| Yes                    |            | 13 (9.6%)              | 53 (12.7%)             | 66 (11.9%)    |         |
| <b>Age</b>             | ind        |                        |                        |               | 0.002   |
| Mean (SD)              |            | 65.06 (9.79)           | 67.62 (8.74)           | 66.97 (9.08)  |         |
| Range                  |            | 33.00–84.00            | 32.00–88.00            | 32.00–88.00   |         |
| <b>SSD Q1</b>          | ind        |                        |                        |               | 0.013   |
| N-Miss                 |            | 14                     | 34                     | 48            |         |
| Mean (SD)              |            | 6.20 (1.73)            | 5.74 (1.94)            | 5.86 (1.90)   |         |
| Range                  |            | 1.00–10.00             | 0.00–10.00             | 0.00–10.00    |         |
| <b>SSD Q2</b>          | ind        |                        |                        |               | 0.098   |
| N-Miss                 |            | 14                     | 34                     | 48            |         |
| Mean (SD)              |            | 6.13 (2.01)            | 5.79 (2.12)            | 5.88 (2.10)   |         |
| Range                  |            | 0.00–10.00             | 0.00–10.00             | 0.00–10.00    |         |
| <b>Martial with</b>    | ind        |                        |                        |               | 0.614   |
| N-Miss                 |            | 1                      | 5                      | 6             |         |
| No                     |            | 30 (19.2%)             | 98 (21.1%)             | 128 (20.6%)   |         |
| Yes                    |            | 126 (80.8%)            | 366 (78.9%)            | 492 (79.4%)   |         |
| <b>Higher school</b>   | ind        |                        |                        |               | 0.926   |
| N-Miss                 |            | 2                      | 7                      | 9             |         |
| No                     |            | 118 (76.1%)            | 350 (75.8%)            | 468 (75.9%)   |         |
| Yes                    |            | 37 (23.9%)             | 112 (24.2%)            | 149 (24.1%)   |         |
| <b>Employed</b>        | ind        |                        |                        |               | 0.325   |
| N-Miss                 |            | 21                     | 52                     | 73            |         |
| No                     |            | 123 (90.4%)            | 364 (87.3%)            | 487 (88.1%)   |         |
| Yes                    |            | 13 (9.6%)              | 53 (12.7%)             | 66 (11.9%)    |         |
| <b>Income</b>          | ind        |                        |                        |               | 0.032   |
| N-Miss                 |            | 38                     | 110                    | 148           |         |
| Mean (SD)              |            | 5.15 (2.00)            | 5.60 (1.94)            | 5.49 (1.97)   |         |
| Range                  |            | 1.00–8.00              | 1.00–8.00              | 1.00–8.00     |         |
| <b>Number Children</b> | ind        |                        |                        |               | 0.305   |
| N-Miss                 |            | 12                     | 47                     | 59            |         |

|               |     |                      |                      |                      |         |
|---------------|-----|----------------------|----------------------|----------------------|---------|
| Mean (SD)     |     | 1.68 (0.98)          | 1.78 (1.07)          | 1.75 (1.05)          |         |
| Range         |     | 0.00–5.00            | 0.00–10.00           | 0.00–10.00           |         |
| EQ-5D-5L      | ind |                      |                      |                      | 0.011   |
| N-Miss        |     | 2                    | 11                   | 13                   |         |
| Mean (SD)     |     | 0.63 (0.19)          | 0.67 (0.18)          | 0.66 (0.18)          |         |
| Range         |     | 0.14–0.92            | 0.05–1.00            | 0.05–1.00            |         |
| OSSS          | ind |                      |                      |                      | < 0.001 |
| N-Miss        |     | 1                    | 6                    | 7                    |         |
| Mean (SD)     |     | 10.51 (2.21)         | 11.17 (1.96)         | 11.00 (2.04)         |         |
| Range         |     | 4.00–14.00           | 5.00–14.00           | 4.00–14.00           |         |
| Pre-treatment | ind |                      |                      |                      | 0.880   |
| N-Miss        |     | 13                   | 41                   | 54                   |         |
| Mean (SD)     |     | 2981.18<br>(4218.51) | 3039.62<br>(3968.95) | 3024.91<br>(4029.56) |         |
| Range         |     | 11.00–24588.00       | 18.00–25032.00       | 11.00–25032.00       |         |
| PHQ-4         | ind |                      |                      |                      | < 0.001 |
| N-Miss        |     | 12                   | 32                   | 44                   |         |
| Mean (SD)     |     | 3.49 (2.96)          | 2.14 (2.28)          | 2.48 (2.53)          |         |
| Range         |     | 0.00–12.00           | 0.00–12.00           | 0.00–12.00           |         |
| LOT-R opt     | ind |                      |                      |                      | < 0.001 |
| N-Miss        |     | 5                    | 16                   | 21                   |         |
| Mean (SD)     |     | 9.45 (2.42)          | 10.46 (2.18)         | 10.21 (2.28)         |         |
| Range         |     | 3.00–12.00           | 0.00–12.00           | 0.00–12.00           |         |
| LOT-R pess    | ind |                      |                      |                      | < 0.001 |
| N-Miss        |     | 6                    | 16                   | 22                   |         |
| Mean (SD)     |     | 8.23 (3.06)          | 9.70 (2.59)          | 9.33 (2.79)          |         |
| Range         |     | 0.00–12.00           | 0.00–12.00           | 0.00–12.00           |         |
| KOOS pain     | ind |                      |                      |                      | < 0.001 |
| N-Miss        |     | 1                    | 4                    | 5                    |         |
| Mean (SD)     |     | 41.90 (15.72)        | 48.13 (17.28)        | 46.56 (17.10)        |         |
| Range         |     | 0.00–87.50           | 0.00–91.67           | 0.00–91.67           |         |
| KOOS symp     | ind |                      |                      |                      | < 0.001 |
| N-Miss        |     | 1                    | 3                    | 4                    |         |
| Mean (SD)     |     | 47.33 (17.55)        | 55.73 (19.38)        | 53.62 (19.28)        |         |
| Range         |     | 3.57–89.29           | 3.57–100.00          | 3.57–100.00          |         |
| KOOS ADL      | ind |                      |                      |                      | < 0.001 |
| N-Miss        |     | 1                    | 3                    | 4                    |         |
| Mean (SD)     |     | 50.54 (19.24)        | 57.06 (17.93)        | 55.42 (18.47)        |         |
| Range         |     | 1.56–98.53           | 4.41–95.59           | 1.56–98.53           |         |
| KOOS sport    | ind |                      |                      |                      | 0.076   |
| N-Miss        |     | 5                    | 20                   | 25                   |         |
| Mean (SD)     |     | 16.07 (15.90)        | 18.95 (17.72)        | 18.22 (17.31)        |         |
| Range         |     | 0.00–80.00           | 0.00–90.00           | 0.00–90.00           |         |
| KOOS QoL      | ind |                      |                      |                      | 0.159   |
| N-Miss        |     | 3                    | 6                    | 9                    |         |

|              |      |               |               |               |         |
|--------------|------|---------------|---------------|---------------|---------|
| Mean (SD)    |      | 23.50 (14.17) | 25.34 (13.96) | 24.88 (14.02) |         |
| Range        |      | 0.00–75.00    | 0.00–81.25    | 0.00–81.25    |         |
| Staffelstein | ind  |               |               |               | 0.010   |
| N-Miss       |      | 28            | 66            | 94            |         |
| Mean (SD)    |      | 78.33 (12.43) | 81.55 (12.37) | 80.77 (12.45) |         |
| Range        |      | 38.00–111.00  | 36.00–115.00  | 36.00–115.00  |         |
| WOMAC pain   | ind  |               |               |               | < 0.001 |
| N-Miss       |      | 1             | 5             | 6             |         |
| Mean (SD)    |      | 45.80 (17.12) | 53.99 (18.29) | 51.93 (18.33) |         |
| Range        |      | 0.00–90.00    | 0.00–95.00    | 0.00–95.00    |         |
| ASA          | pre  |               |               |               | 0.973   |
| N-Miss       |      | 3             | 2             | 5             |         |
| Mean (SD)    |      | 2.24 (0.52)   | 2.24 (0.55)   | 2.24 (0.54)   |         |
| Range        |      | 1.00–3.00     | 1.00–4.00     | 1.00–4.00     |         |
| SSD Q1       | pre  |               |               |               | 0.482   |
| N-Miss       |      | 57            | 128           | 185           |         |
| Mean (SD)    |      | 5.73 (1.94)   | 5.58 (1.82)   | 5.62 (1.85)   |         |
| Range        |      | 0.00–10.00    | 0.00–10.00    | 0.00–10.00    |         |
| TUG          | pre  |               |               |               | 0.621   |
| N-Miss       |      | 15            | 31            | 46            |         |
| Mean (SD)    |      | 12.38 (4.10)  | 12.17 (4.52)  | 12.22 (4.42)  |         |
| Range        |      | 6.00–29.00    | 6.00–49.00    | 6.00–49.00    |         |
| Pain rest    | pre  |               |               |               | < 0.001 |
| N-Miss       |      | 19            | 46            | 65            |         |
| Mean (SD)    |      | 3.48 (2.44)   | 2.43 (2.37)   | 2.68 (2.43)   |         |
| Range        |      | 0.00–9.00     | 0.00–10.00    | 0.00–10.00    |         |
| Pain load    | pre  |               |               |               | 0.016   |
| N-Miss       |      | 19            | 47            | 66            |         |
| Mean (SD)    |      | 5.25 (2.30)   | 4.64 (2.63)   | 4.79 (2.56)   |         |
| Range        |      | 0.00–10.00    | 0.00–10.00    | 0.00–10.00    |         |
| ISAR         | pre  |               |               |               | 0.005   |
| N-Miss       |      | 40            | 97            | 137           |         |
| Mean (SD)    |      | 0.58 (0.84)   | 0.35 (0.72)   | 0.41 (0.76)   |         |
| Range        |      | 0.00–4.00     | 0.00–6.00     | 0.00–6.00     |         |
| PHQ-4        | pre  |               |               |               | < 0.001 |
| N-Miss       |      | 56            | 124           | 180           |         |
| Mean (SD)    |      | 3.81 (3.17)   | 2.03 (2.13)   | 2.43 (2.52)   |         |
| Range        |      | 0.00–12.00    | 0.00–12.00    | 0.00–12.00    |         |
| Height       | surg |               |               |               | 0.986   |
| Mean (SD)    |      | 170.92 (9.71) | 170.90 (9.28) | 170.91 (9.38) |         |
| Range        |      | 148.00–198.00 | 136.00–198.00 | 136.00–198.00 |         |
| Weight       | surg |               |               |               | 0.027   |
| Mean (SD)    |      | 90.55 (18.46) | 86.90 (17.76) | 87.81 (18.00) |         |
| Range        |      | 53.00–150.00  | 45.00–175.00  | 45.00–175.00  |         |

|                         |      |               |               |               |         |
|-------------------------|------|---------------|---------------|---------------|---------|
| <b>Surg duration</b>    | surg |               |               |               | 0.128   |
| Mean (SD)               |      | 70.17 (34.78) | 65.78 (29.85) | 66.88 (31.19) |         |
| Range                   |      | 17.00–278.00  | 23.00–243.00  | 17.00–278.00  |         |
| <b>Cortisone</b>        | surg |               |               |               | 0.881   |
| No                      |      | 4 (2.5%)      | 13 (2.8%)     | 17 (2.7%)     |         |
| Yes                     |      | 153 (97.5%)   | 456 (97.2%)   | 609 (97.3%)   |         |
| <b>Surg tranex</b>      | surg |               |               |               | 0.619   |
| No                      |      | 14 (8.9%)     | 36 (7.7%)     | 50 (8.0%)     |         |
| Yes                     |      | 143 (91.1%)   | 433 (92.3%)   | 576 (92.0%)   |         |
| <b>Intub anesthesia</b> | surg |               |               |               | 0.480   |
| N-Miss                  |      | 52            | 182           | 234           |         |
| SPA                     |      | 43 (41.0%)    | 129 (44.9%)   | 172 (43.9%)   |         |
| ITN                     |      | 62 (59.0%)    | 158 (55.1%)   | 220 (56.1%)   |         |
| <b>Surg tourn</b>       | surg |               |               |               | 0.181   |
| No                      |      | 109 (69.4%)   | 298 (63.5%)   | 407 (65.0%)   |         |
| Yes                     |      | 48 (30.6%)    | 171 (36.5%)   | 219 (35.0%)   |         |
| <b>Surg LIA</b>         | surg |               |               |               | 0.905   |
| No                      |      | 7 (4.5%)      | 22 (4.7%)     | 29 (4.6%)     |         |
| Yes                     |      | 150 (95.5%)   | 447 (95.3%)   | 597 (95.4%)   |         |
| <b>Surg drain</b>       | surg |               |               |               | 0.866   |
| No                      |      | 154 (98.1%)   | 461 (98.3%)   | 615 (98.2%)   |         |
| Yes                     |      | 3 (1.9%)      | 8 (1.7%)      | 11 (1.8%)     |         |
| <b>Walking dist</b>     | post |               |               |               | 0.188   |
| N-Miss                  |      | 89            | 306           | 395           |         |
| Mean (SD)               |      | 1.94 (0.45)   | 2.04 (0.52)   | 2.01 (0.50)   |         |
| Range                   |      | 1.00–3.00     | 1.00–4.00     | 1.00–4.00     |         |
| <b>SSD Q1</b>           | post |               |               |               | 0.534   |
| N-Miss                  |      | 13            | 38            | 51            |         |
| Mean (SD)               |      | 4.85 (2.32)   | 4.98 (2.26)   | 4.95 (2.27)   |         |
| Range                   |      | 0.00–9.00     | 0.00–10.00    | 0.00–10.00    |         |
| <b>SSD Q2</b>           | post |               |               |               | 0.922   |
| N-Miss                  |      | 14            | 42            | 56            |         |
| Mean (SD)               |      | 4.98 (2.65)   | 5.01 (2.42)   | 5.00 (2.48)   |         |
| Range                   |      | 0.00–10.00    | 0.00–10.00    | 0.00–10.00    |         |
| <b>TUG</b>              | post |               |               |               | 0.023   |
| N-Miss                  |      | 25            | 87            | 112           |         |
| Mean (SD)               |      | 18.22 (8.26)  | 16.70 (5.91)  | 17.09 (6.62)  |         |
| Range                   |      | 7.00–88.00    | 5.00–53.00    | 5.00–88.00    |         |
| <b>Pain rest</b>        | post |               |               |               | < 0.001 |
| N-Miss                  |      | 21            | 73            | 94            |         |
| Mean (SD)               |      | 2.62 (1.90)   | 1.92 (1.72)   | 2.10 (1.79)   |         |
| Range                   |      | 0.00–8.00     | 0.00–8.00     | 0.00–8.00     |         |
| <b>Pain load</b>        | post |               |               |               | 0.002   |
| N-Miss                  |      | 21            | 73            | 94            |         |

|                |       |               |               |               |         |
|----------------|-------|---------------|---------------|---------------|---------|
| Mean (SD)      |       | 3.89 (1.95)   | 3.32 (1.80)   | 3.46 (1.85)   |         |
| Range          |       | 0.00–9.00     | 0.00–8.00     | 0.00–9.00     |         |
| EQ-5D-5L       | post  |               |               |               | 0.022   |
| N-Miss         |       | 9             | 24            | 33            |         |
| Mean (SD)      |       | 0.76 (0.17)   | 0.80 (0.15)   | 0.79 (0.15)   |         |
| Range          |       | 0.17–1.00     | 0.26–1.00     | 0.17–1.00     |         |
| LOS            | post  |               |               |               | 0.637   |
| Mean (SD)      |       | 5.46 (2.61)   | 5.35 (2.53)   | 5.38 (2.55)   |         |
| Range          |       | 2.00–24.00    | 2.00–37.00    | 2.00–37.00    |         |
| PHQ-4          | post  |               |               |               | < 0.001 |
| N-Miss         |       | 12            | 33            | 45            |         |
| Mean (SD)      |       | 2.71 (2.79)   | 1.71 (2.10)   | 1.96 (2.33)   |         |
| Range          |       | 0.00–12.00    | 0.00–12.00    | 0.00–12.00    |         |
| Staffelstein   | post  |               |               |               | 0.191   |
| N-Miss         |       | 8             | 15            | 23            |         |
| Mean (SD)      |       | 76.10 (14.54) | 77.97 (15.36) | 77.51 (15.17) |         |
| Range          |       | 29.00–110.00  | 25.00–119.00  | 25.00–119.00  |         |
| EQ-5D-5L       | rehab |               |               |               | < 0.001 |
| N-Miss         |       | 57            | 187           | 244           |         |
| Mean (SD)      |       | 0.77 (0.14)   | 0.84 (0.11)   | 0.82 (0.12)   |         |
| Range          |       | 0.36–1.00     | 0.21–1.00     | 0.21–1.00     |         |
| TUG            | rehab |               |               |               | 0.752   |
| N-Miss         |       | 98            | 313           | 411           |         |
| Mean (SD)      |       | 10.86 (3.68)  | 11.08 (4.63)  | 11.02 (4.39)  |         |
| Range          |       | 5.00–22.00    | 5.00–44.00    | 5.00–44.00    |         |
| Pain rest      | rehab |               |               |               | 0.001   |
| N-Miss         |       | 93            | 301           | 394           |         |
| Mean (SD)      |       | 2.28 (1.85)   | 1.50 (1.51)   | 1.72 (1.65)   |         |
| Range          |       | 0.00–8.00     | 0.00–6.00     | 0.00–8.00     |         |
| Pain load      | rehab |               |               |               | 0.002   |
| N-Miss         |       | 94            | 301           | 395           |         |
| Mean (SD)      |       | 3.68 (1.94)   | 2.86 (1.71)   | 3.09 (1.81)   |         |
| Range          |       | 0.00–8.00     | 0.00–8.00     | 0.00–8.00     |         |
| PHQ-4          | rehab |               |               |               | < 0.001 |
| N-Miss         |       | 57            | 188           | 245           |         |
| Mean (SD)      |       | 2.49 (2.12)   | 1.04 (1.73)   | 1.42 (1.95)   |         |
| Range          |       | 0.00–8.00     | 0.00–12.00    | 0.00–12.00    |         |
| rehab duration | rehab |               |               |               | 0.498   |
| N-Miss         |       | 56            | 178           | 234           |         |
| Mean (SD)      |       | 23.07 (5.24)  | 21.84 (4.26)  | 22.16 (4.56)  |         |
| Range          |       | 12.00–52.00   | 4.00–42.00    | 4.00 - 52.00  |         |
| Staffelstein   | rehab |               |               |               | < 0.001 |
| N-Miss         |       | 86            | 231           | 317           |         |
| Mean (SD)      |       | 85.04 (12.36) | 92.43 (13.21) | 90.73 (13.37) |         |
| Range          |       | 48.00–109.00  | 47.00–120.00  | 47.00–120.00  |         |

|                   |     |               |               |               |         |
|-------------------|-----|---------------|---------------|---------------|---------|
| <b>SSD Q1</b>     | 3mo |               |               |               | < 0.001 |
| N-Miss            |     | 15            | 49            | 64            |         |
| Mean (SD)         |     | 4.21 (1.88)   | 2.72 (1.97)   | 3.10 (2.05)   |         |
| Range             |     | 0.00–8.00     | 0.00–9.00     | 0.00–9.00     |         |
| <b>EQ-5D-5L</b>   | 3mo |               |               |               | < 0.001 |
| N-Miss            |     | 12            | 41            | 53            |         |
| Mean (SD)         |     | 0.74 (0.18)   | 0.87 (0.11)   | 0.84 (0.14)   |         |
| Range             |     | 0.07–1.00     | 0.26–1.00     | 0.07–1.00     |         |
| <b>KOOS pain</b>  | 3mo |               |               |               | < 0.001 |
| N-Miss            |     | 11            | 31            | 42            |         |
| Mean (SD)         |     | 55.16 (17.13) | 75.76 (15.37) | 70.61 (18.16) |         |
| Range             |     | 5.56–100.00   | 36.11–100.00  | 5.56–100.00   |         |
| <b>KOOS symp</b>  | 3mo |               |               |               | < 0.001 |
| N-Miss            |     | 11            | 29            | 40            |         |
| Mean (SD)         |     | 54.06 (17.52) | 72.40 (15.05) | 67.83 (17.58) |         |
| Range             |     | 17.86–96.43   | 28.57–100.00  | 17.86–100.00  |         |
| <b>KOOS ADL</b>   | 3mo |               |               |               | < 0.001 |
| N-Miss            |     | 11            | 31            | 42            |         |
| Mean (SD)         |     | 60.62 (16.21) | 79.64 (13.60) | 74.88 (16.49) |         |
| Range             |     | 11.76–95.59   | 26.56–100.00  | 11.76–100.00  |         |
| <b>KOOS sport</b> | 3mo |               |               |               | < 0.001 |
| N-Miss            |     | 29            | 94            | 123           |         |
| Mean (SD)         |     | 29.41 (21.90) | 49.59 (25.18) | 44.46 (25.91) |         |
| Range             |     | 0.00–80.00    | 0.00–100.00   | 0.00–100.00   |         |
| <b>KOOS QoL</b>   | 3mo |               |               |               | < 0.001 |
| N-Miss            |     | 9             | 32            | 41            |         |
| Mean (SD)         |     | 36.53 (19.02) | 56.66 (20.86) | 51.56 (22.19) |         |
| Range             |     | 0.00–93.75    | 0.00–100.00   | 0.00–100.00   |         |
| <b>WOMAC pain</b> | 3mo |               |               |               | < 0.001 |
| N-Miss            |     | 11            | 31            | 42            |         |
| Mean (SD)         |     | 59.90 (17.48) | 79.86 (14.38) | 74.87 (17.49) |         |
| Range             |     | 10.00–100.00  | 40.00–100.00  | 10.00–100.00  |         |
| <b>PHQ-4</b>      | 3mo |               |               |               | < 0.001 |
| N-Miss            |     | 20            | 64            | 84            |         |
| Mean (SD)         |     | 2.97 (2.86)   | 1.09 (1.90)   | 1.57 (2.33)   |         |
| Range             |     | 0.00–12.00    | 0.00–12.00    | 0.00–12.00    |         |
| <b>SSD Q1</b>     | 6mo |               |               |               | < 0.001 |
| N-Miss            |     | 22            | 51            | 73            |         |
| Mean (SD)         |     | 4.16 (1.95)   | 2.24 (1.85)   | 2.71 (2.05)   |         |
| Range             |     | 0.00–9.00     | 0.00–10.00    | 0.00–10.00    |         |
| <b>SSD Q2</b>     | 6mo |               |               |               | < 0.001 |
| N-Miss            |     | 23            | 56            | 79            |         |
| Mean (SD)         |     | 4.13 (2.14)   | 2.08 (1.93)   | 2.59 (2.17)   |         |
| Range             |     | 0.00–9.00     | 0.00–10.00    | 0.00–10.00    |         |
| <b>EQ-5D-5L</b>   | 6mo |               |               |               | < 0.001 |
| N-Miss            |     | 20            | 36            | 56            |         |

|            |     |               |               |               |         |
|------------|-----|---------------|---------------|---------------|---------|
| Mean (SD)  |     | 0.75 (0.18)   | 0.90 (0.11)   | 0.86 (0.14)   |         |
| Range      |     | 0.04–1.00     | 0.14–1.00     | 0.04–1.00     |         |
| PHQ-4      | 6mo |               |               |               | < 0.001 |
| N-Miss     |     | 27            | 62            | 89            |         |
| Mean (SD)  |     | 2.88 (2.66)   | 0.93 (1.64)   | 1.40 (2.11)   |         |
| Range      |     | 0.00–11.00    | 0.00–12.00    | 0.00–12.00    |         |
| KOOS pain  | 6mo |               |               |               | < 0.001 |
| N-Miss     |     | 16            | 19            | 35            |         |
| Mean (SD)  |     | 58.34 (16.85) | 82.80 (13.86) | 76.96 (17.95) |         |
| Range      |     | 16.67–100.00  | 33.33–100.00  | 16.67–100.00  |         |
| KOOS symp  | 6mo |               |               |               | < 0.001 |
| N-Miss     |     | 17            | 20            | 37            |         |
| Mean (SD)  |     | 58.21 (14.42) | 78.81 (14.61) | 73.91 (17.00) |         |
| Range      |     | 14.29–89.29   | 28.57–100.00  | 14.29–100.00  |         |
| KOOS ADL   | 6mo |               |               |               | < 0.001 |
| N-Miss     |     | 19            | 21            | 40            |         |
| Mean (SD)  |     | 62.72 (15.65) | 84.16 (12.55) | 79.11 (16.15) |         |
| Range      |     | 20.59–92.65   | 35.29–100.00  | 20.59–100.00  |         |
| KOOS sport | 6mo |               |               |               | < 0.001 |
| N-Miss     |     | 28            | 60            | 88            |         |
| Mean (SD)  |     | 32.29 (21.60) | 58.92 (23.32) | 52.53 (25.57) |         |
| Range      |     | 0.00–85.00    | 0.00–100.00   | 0.00–100.00   |         |
| KOOS QoL   | 6mo |               |               |               | < 0.001 |
| N-Miss     |     | 16            | 22            | 38            |         |
| Mean (SD)  |     | 40.65 (19.52) | 65.57 (20.48) | 59.59 (22.87) |         |
| Range      |     | 0.00–91.67    | 0.00–100.00   | 0.00–100.00   |         |
| WOMAC pain | 6mo |               |               |               | < 0.001 |
| N-Miss     |     | 16            | 19            | 35            |         |
| Mean (SD)  |     | 63.05 (17.17) | 86.01 (12.99) | 80.53 (17.16) |         |
| Range      |     | 20.00–100.00  | 25.00–100.00  | 20.00–100.00  |         |
| SSD Q1     | 1y  |               |               |               | < 0.001 |
| N-Miss     |     | 11            | 23            | 34            |         |
| Mean (SD)  |     | 3.95 (2.07)   | 1.84 (1.81)   | 2.36 (2.09)   |         |
| Range      |     | 0.00 - 10.00  | 0.00 - 9.00   | 0.00 - 10.00  |         |
| SSD Q2     | 1y  |               |               |               | < 0.001 |
| N-Miss     |     | 10            | 23            | 33            |         |
| Mean (SD)  |     | 4.03 (2.28)   | 1.64 (1.80)   | 2.24 (2.19)   |         |
| Range      |     | 0.00 - 10.00  | 0.00 - 10.00  | 0.00 - 10.00  |         |
| EQ-5D-5L   | 1y  |               |               |               | < 0.001 |
| N-Miss     |     | 8             | 20            | 28            |         |
| Mean (SD)  |     | 0.75 (0.18)   | 0.93 (0.10)   | 0.89 (0.14)   |         |
| Range      |     | 0.09 - 1.00   | 0.26 - 1.00   | 0.09 - 1.00   |         |
| PHQ-4      | 1y  |               |               |               | < 0.001 |
| N-Miss     |     | 13            | 41            | 54            |         |
| Mean (SD)  |     | 2.74 (2.99)   | 0.80 (1.49)   | 1.29 (2.15)   |         |
| Range      |     | 0.00 - 12.00  | 0.00 - 10.00  | 0.00 - 12.00  |         |
| KOOS symp  | 1y  |               |               |               | < 0.001 |
| N-Miss     |     | 3             | 3             | 6             |         |
| Mean (SD)  |     | 61.51 (15.61) | 84.79 (12.11) | 79.01 (16.48) |         |

|                   |    |               |                |                |         |
|-------------------|----|---------------|----------------|----------------|---------|
| Range             |    | 14.29 - 95.83 | 42.86 - 100.00 | 14.29 - 100.00 |         |
| <b>KOOS ADL</b>   | 1y |               |                |                | < 0.001 |
| N-Miss            |    | 0             | 2              | 2              |         |
| Mean (SD)         |    | 62.81 (16.35) | 90.22 (9.15)   | 83.32 (16.47)  |         |
| Range             |    | 6.67 - 100.00 | 45.59 - 100.00 | 6.67 - 100.00  |         |
| <b>KOOS sport</b> | 1y |               |                |                | < 0.001 |
| N-Miss            |    | 14            | 56             | 70             |         |
| Mean (SD)         |    | 35.57 (24.58) | 67.68 (21.08)  | 59.42 (26.11)  |         |
| Range             |    | 0.00 - 90.00  | 0.00 - 100.00  | 0.00 - 100.00  |         |
| <b>KOOS Qol</b>   | 1y |               |                |                | < 0.001 |
| N-Miss            |    | 2             | 6              | 8              |         |
| Mean (SD)         |    | 42.31 (18.54) | 72.95 (18.71)  | 65.26 (22.90)  |         |
| Range             |    | 0.00 - 87.50  | 18.75 - 100.00 | 0.00 - 100.00  |         |



**Table S2:** Details for the prediction model based on preoperative data, non-standardized and standardized, using LASSO min

|                                    |                 |                |                   |                    |
|------------------------------------|-----------------|----------------|-------------------|--------------------|
| <b>Using non-standardized data</b> |                 |                |                   |                    |
| (Intercept)                        | Alcohol, ind    | Age, ind       | Marital with, ind | Higher school, pre |
| -1.238                             | 0.040           | 0.014          | -0.069            | -0.018             |
| Number children, ind               | OSSS, ind       | LOT-R opt, ind | LOT-R pess. ind   | KOOS symp, ind     |
| 0.019                              | 0.037           | 0.031          | 0.08              | 0.005              |
| KOOS QoL, ind                      | WOMAC pain, ind | SSD Q1, pre    | TUG, pre          | VAS rest, pre      |
| -0.003                             | 0.003           | 0.05           | -0.003            | -0.09              |
| ISAR, pre                          | PHQ-4, pre      |                |                   |                    |
| -0.05                              | -0.1            |                |                   |                    |
| <b>Using standardized data</b>     |                 |                |                   |                    |
| (Intercept)                        | Alcohol, ind    | Age, ind       | Marital with, ind | Higher school, pre |
| 1.065                              | 0.013           | 0.133          | -0.030            | -0.008             |
| Number children, ind               | OSSS, ind       | LOT-R opt, ind | LOT-R pess. ind   | KOOS symp, ind     |
| 0.021                              | 0.078           | 0.072          | 0.2               | 0.1                |
| KOOS QoL, ind                      | WOMAC pain, ind | SSD Q1, pre    | TUG, pre          | VAS rest, pre      |
| -0.04                              | 0.05            | 0.09           | -0.02             | -0.2               |
| ISAR, pre                          | PHQ-4, pre      |                |                   |                    |
| -0.04                              | -0.4            |                |                   |                    |

**Table S3:** Details for the prediction model based on data up to 6 month after surgery, non-standardized and standardized, using LASSO min

|                                    |                      |                 |                 |                    |
|------------------------------------|----------------------|-----------------|-----------------|--------------------|
| <b>Using non-standardized data</b> |                      |                 |                 |                    |
| (Intercept)                        | Number children, ind | LOT-R pess, ind | KOOS QoL, ind   | SSD Q1, pre        |
| -6.01                              | 0.02                 | 0.04            | -0.004          | 0.01               |
| TUG, pre                           | VAS rest, pre        | PHQ-4, pre      | Cortisone, surg | Walking dist, post |
| -0.0002                            | -0.05                | -0.08           | 0.2             | 0.09               |
| SSD Q1, post                       | VAS load, post       | SSD Q2, rehab   | TUG, rehab      | VAS rest, rehab    |
| 0.07                               | 0.01                 | -0.02           | 0.003           | -0.01              |
| VAS load, rehab                    | Staffelstein, rehab  | SSD Q2, 3 mo    | KOOS pain, 3 mo | KOOS ADL, 3 mo     |
| -0.04                              | 0.01                 | -0.01           | 0.01            | 0.01               |
| WOMAC pain, 3 mo                   | EQ-5D-5L, 6 mo       | PHQ-4, 6 mo     | KOOS symp, 6 mo | KOOS ADL, 6 mo     |
| 0.01                               | 0.46                 | -0.05           | 0.02            | 0.01               |
| KOOS sport, 6 mo                   | WOMAC pain, 6 mo     |                 |                 |                    |
| 0.01                               | 0.02                 |                 |                 |                    |
| <b>Using standardized data</b>     |                      |                 |                 |                    |
| (Intercept)                        | Number children, ind | LOT-R pess, ind | KOOS QoL, ind   | SSD Q1, pre        |
| 1.29                               | 0.02                 | 0.12            | -0.05           | 0.01               |
| TUG, pre                           | VAS rest, pre        | PHQ-4, pre      | Cortisone, surg | Walking dist, post |
| -0.0009                            | -0.13                | -0.21           | 0.03            | 0.05               |
| SSD Q1, post                       | VAS load, post       | SSD Q2, rehab   | TUG, rehab      | VAS rest, rehab    |
| 0.18                               | 0.01                 | -0.05           | 0.01            | -0.01              |
| VAS load, rehab                    | Staffelstein, rehab  | SSD Q2, 3 mo    | KOOS pain, 3 mo | KOOS ADL, 3 mo     |
| -0.08                              | 0.14                 | -0.02           | 0.09            | 0.1                |
| WOMAC pain, 3 mo                   | EQ-5D-5L, 6 mo       | PHQ-4, 6 mo     | KOOS symp, 6 mo | KOOS ADL, 6 mo     |
| 0.21                               | 0.07                 | -0.11           | 0.36            | 0.15               |
| KOOS sport, 6 mo                   | WOMAC pain, 6 mo     |                 |                 |                    |
| 0.15                               | 0.32                 |                 |                 |                    |
